# Supplementary material for: Maternal Metformin Treatment Reprograms Maternal High-Fat Diet-Induced Hepatic Steatosis in Offspring Associated with Placental Glucose Transporter Modifications
Source: MDPI journal article supplement (doi:10.3390/ijms232214239), 2022-11-17
Supplement: s1 [file s1]

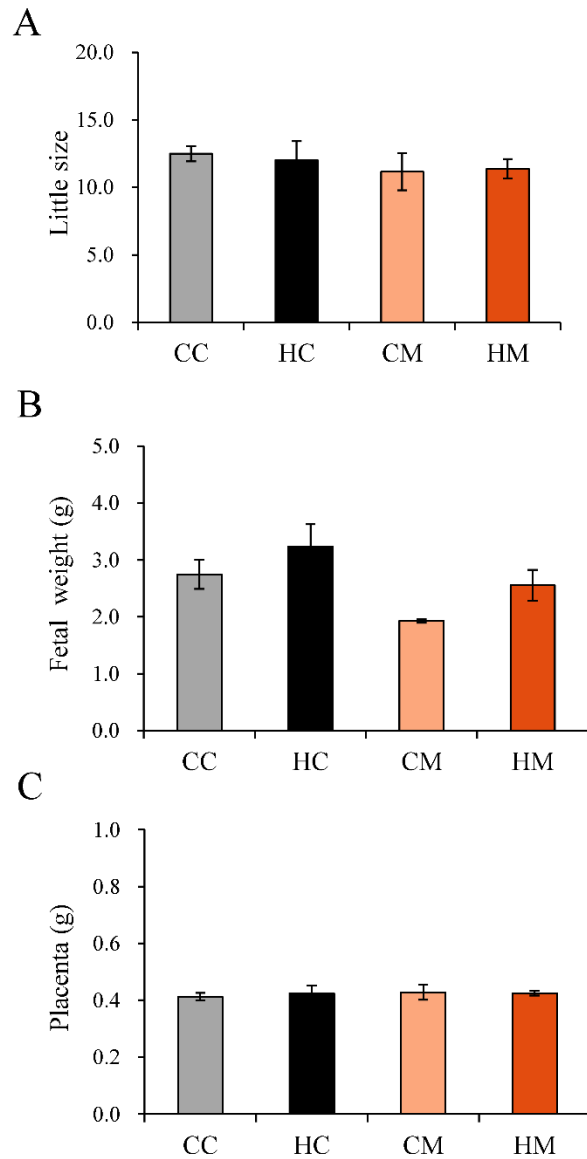

Figure S1: The placental weight and litter characteristics among the four groups (A) litter size (B) fetal weight (C) placenta weight.

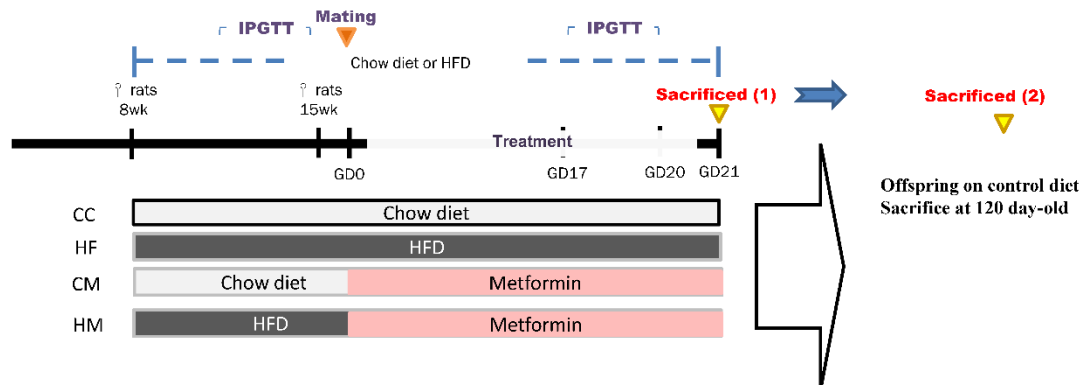

Figure S2: Schematic diagram of the experimental design.

Supplementary Table S1. Primer sequences for RT-PCR in this study.

| Rat Gene      | primer  | sequence (5' to 3')         |
|---------------|---------|-----------------------------|
| <i>GLUT1</i>  | Forward | TGGCCAAGGACACACGAATACTGA    |
|               | Reverse | TGGAAGAGACAGGAATGGGCGAAT    |
| <i>GLUT2</i>  | Forward | TAGTCAGATTGCTGGCCTCAGCTT    |
|               | Reverse | TTGCCCTGACTTCCTCTTCCAAC     |
| <i>GLUT3</i>  | Forward | TGGCTACAACACCGGAGTCATCAA    |
|               | Reverse | CTGCCAAAGCGGTTGACAAAGAGT    |
| <i>GLUT4</i>  | Forward | TTTCCAGTATGTTGCGGATG        |
|               | Reverse | TCAGTCATTCTCATCTGGCC        |
| <i>Leptin</i> | Forward | CGGTTCTGTGGCTTTGGT          |
|               | Reverse | CCGACTGCGTGTGTGAAATG        |
| <i>LepR</i>   | Forward | ACTGGGACATAGAGTGCTGGAT      |
|               | Reverse | GTTGCACTGGACAGTCTGAAAG      |
| <i>ACC1</i>   | Forward | TGAGGAGGACCGCATTATC         |
|               | Reverse | GCATGGAATGGCAGTAAGGT        |
| <i>ACC2</i>   | Forward | CGCTGCGGTCAAGTGT            |
|               | Reverse | CGTTGGCGTAGTTGTTATT         |
| <i>ACL</i>    | Forward | ACCCAGAGGAAGCCTACATTGC      |
|               | Reverse | TTCGCCAGTTCGTTGACACC        |
| <i>FAS</i>    | Forward | AGATCCTGGAACGTGAACATGA      |
|               | Reverse | GCCGTACTTCACGAATGGGT        |
| <i>LPL</i>    | Forward | GTACAGTCTTGGAGCCCATGC       |
|               | Reverse | GCCAGTAATTCTATTGACCTTCTTGTT |
| <i>ATGL</i>   | Forward | TGTGGCCTCATTCTCCTAC         |
|               | Reverse | TCGTGGATGTTGGTGGAGCT        |
| <i>HSL</i>    | Forward | GCTGGGCTGTCAAGCACTGT        |
|               | Reverse | GTAAGTGGGTAGGCTGCCAT        |
| <i>MGL</i>    | Forward | TGACCAACTCTGTCCTCCAT        |
|               | Reverse | GCACTGCCCTTCCTCTT           |
| <i>18S</i>    | Forward | GCGATGCGGCGGCGTTAT          |
|               | Reverse | AGACTTTGGTTTCCCGGAAGC       |
| <i>GAPDH</i>  | Forward | TCTTGTGCAGTGCCAGCCTC        |
|               | Reverse | GTCACAAGAGAAGGCAGCCCTGG     |

Abbreviation: GLUT1, glucose transporter 1 ; GLUT2, glucose transporter 2 ; GLUT3, glucose transporter 3 ; GLUT4, glucose transporter 4 ; LepR, leptin receptor ; ACC1, acetyl-CoA carboxylase 1 ; ACC2, acetyl-CoA carboxylase 2 ; ACL, acylcholesterol

lipase; FAS, fatty acid synthetase ; LPL, lipoprotein lipase; ATGL, adipose triglyceride lipase ; HSL, hormone-sensitive lipase ; MGL, monoacylglycerol lipase ; GAPDH, glyceraldehyde-3-phosphate dehydrogenase

Supplementary Table S2. The weekly body weight change of dams

|           | 8w                        | 9w                        | 10w                       | 11w                       | 12w                       | 13w                       |
|-----------|---------------------------|---------------------------|---------------------------|---------------------------|---------------------------|---------------------------|
| <b>CC</b> | 210.22±3.33               | 208.80±2.68               | 214.90±2.61               | 227.55±2.95               | 231.84±2.77               | 240.28±2.93               |
| <b>HC</b> | 217.21±4.17               | 234.51±5.59 <sup>*</sup>  | 255.14±8.26 <sup>*</sup>  | 272.96±8.95 <sup>*</sup>  | 287.96±9.84 <sup>*</sup>  | 298.01±9.88 <sup>*</sup>  |
| <b>CM</b> | 205.38±2.68               | 199.85±1.94 <sup>#</sup>  | 205.90±1.73 <sup>#</sup>  | 217.40±2.42 <sup>#</sup>  | 225.60±1.87 <sup>#</sup>  | 232.00±2.19 <sup>#</sup>  |
| <b>HM</b> | 215.01±4.30               | 232.80±4.45 <sup>*†</sup> | 253.25±4.64 <sup>*†</sup> | 269.21±5.36 <sup>*†</sup> | 279.28±5.62 <sup>*†</sup> | 289.60±7.40 <sup>*†</sup> |
|           | 14w                       | 15w                       | 16w                       | 17w                       | 18w                       | 19w                       |
| <b>CC</b> | 252.42±3.03               | 247.00±4.24               | 255.40±4.75               | 276.89±4.81               | 292.05±5.39               | 312.47±2.52               |
| <b>HC</b> | 307.70±10.34 <sup>*</sup> | 305.11±11.70 <sup>*</sup> | 309.78±13.08 <sup>*</sup> | 318.33±18.20 <sup>*</sup> | 355.29±11.52 <sup>*</sup> | 395.29±10.92 <sup>*</sup> |
| <b>CM</b> | 241.03±2.48 <sup>#</sup>  | 253.07±2.36 <sup>#</sup>  | 261.47±2.37 <sup>#</sup>  | 265.25±2.29 <sup>#</sup>  | 278.15±4.83 <sup>#</sup>  | 302.00±9.24 <sup>#</sup>  |
| <b>HM</b> | 298.10±8.39 <sup>*†</sup> | 300.75±8.40 <sup>*†</sup> | 303.00±8.91 <sup>*†</sup> | 291.44±7.99               | 292.95±6.91 <sup>#</sup>  | 300.19±6.25 <sup>#</sup>  |

The results are presented as mean ± standard error. ;\*compared with CC,  $P < 0.05$ ; # compared with HC,  $P < 0.05$ ; † compared to the CM group,  $P < 0.05$ .

Abbreviation: CC, maternal control diet ; HC, maternal high-fat diet ; CM, maternal control diet plus metformin treatment ; HM, maternal high-fat diet plus metformin treatment

Supplementary Table S3. Intraperitoneal glucose tolerance test (IPGTT) of dams

| Min.        | CC             | HC                          | CM                         | HM                           |
|-------------|----------------|-----------------------------|----------------------------|------------------------------|
| 0           | 71.00 ± 4.70   | 64.40 ± 4.23                | 61.60 ± 4.70               | 57.20 ± 2.27                 |
| 15          | 183.80 ± 39.97 | 386.20 ± 57.93 <sup>*</sup> | 290.40 ± 24.06             | 254.80 ± 49.53 <sup>*#</sup> |
| 30          | 166.00 ± 30.68 | 319.20 ± 48.24 <sup>*</sup> | 206.60 ± 6.80 <sup>#</sup> | 220.80 ± 48.94               |
| 60          | 114.00 ± 20.71 | 142.00 ± 14.20              | 90.00 ± 3.45               | 127.80 ± 31.18               |
| 120         | 82.80 ± 9.96   | 76.20 ± 6.87                | 69.00 ± 6.28               | 58.40 ± 6.26                 |
| AUC (x1000) | 14.64 ± 1.76   | 22.13 ± 2.10                | 15.59 ± 0.54               | 16.72 ± 2.70                 |

The results are presented as mean ± standard error. ;\*compared with CC,  $P < 0.05$ ; # compared with HC,  $P < 0.05$ .

The integrated AUC values of the IPGTT were calculated using the trapezoidal method and a repeated-measure analysis of variance (ANOVA) model.

Abbreviation: CC, maternal control diet ; HC, maternal high-fat diet ; CM, maternal control diet plus metformin treatment ; HM, maternal high-fat diet plus metformin treatment ; AUC, area under curve

Supplementary Table S4. The monthly body weight change of offspring

|    | CC          | HC                        | CM                        | HM                         |
|----|-------------|---------------------------|---------------------------|----------------------------|
| 1M | 54.36±2.38  | 86.92±3.67 <sup>*</sup>   | 53.53±1.19 <sup>#</sup>   | 64.37±6.30 <sup>*#†</sup>  |
| 2M | 202.40±5.09 | 268.04±8.48 <sup>*</sup>  | 213.09±4.01 <sup>#</sup>  | 226.20±11.92 <sup>*#</sup> |
| 3M | 322.32±4.92 | 397.19±12.38 <sup>*</sup> | 351.55±6.11 <sup>*#</sup> | 351.31±10.65 <sup>*#</sup> |
| 4M | 384.15±7.22 | 459.63±10.85 <sup>*</sup> | 416.15±9.61 <sup>*#</sup> | 427.92±12.89 <sup>*</sup>  |

\* compared to the CC group,  $P < 0.05$ ; # compared to the HC group,  $P < 0.05$ ; † compared to the CM group,  $P < 0.05$ .

Abbreviation: CC, maternal control diet ; HC, maternal high-fat diet ; CM, maternal control diet plus metformin treatment ; HM, maternal high-fat diet plus metformin treatment ; AUC, area under curve

Supplementary Table S5. Intraperitoneal glucose tolerance test (IPGTT) of offspring

| Min.        | CC             | HC               | CM               | HM                |
|-------------|----------------|------------------|------------------|-------------------|
| 0           | 80.92 ± 2.33   | 80.75 ± 2.97     | 78.00 ± 2.24     | 85.75 ± 1.87      |
| 15          | 240.31 ± 18.47 | 308.58 ± 20.63 * | 313.85 ± 16.99 * | 238.75 ± 24.33 #† |
| 30          | 209.46 ± 14.75 | 235.33 ± 19.30   | 278.77 ± 12.07 * | 213.00 ± 25.33 †  |
| 60          | 152.15 ± 8.62  | 171.83 ± 9.00    | 188.23 ± 8.08 *  | 138.50 ± 20.03 #† |
| 120         | 90.92 ± 4.89   | 99.33 ± 6.06     | 99.69 ± 4.59     | 98.13 ± 4.08      |
| AUC (x1000) | 18.50 ± 0.92   | 21.24 ± 1.07     | 23.03 ± 0.84 *   | 18.19 ± 1.70 †    |

The results are presented as mean ± standard error. ;\*compared with CC,  $P < 0.05$ ; # compared with HF,  $P < 0.05$ ; † compared to the CM group,  $P < 0.05$ .

Abbreviation: CC, maternal control diet ; HC. maternal high-fat diet ; CM, maternal control diet plus metformin treatment ; HM, maternal high-fat diet plus metformin treatment ; AUC, area under curve
